# Supplementary material for: Sox2 haploinsufficiency primes regeneration and Wnt responsiveness in the mouse cochlea
Source: JCI journal article supplement (doi:10.1172/jci97248), 2018-03-18
Supplement: sd1 [file 1]

Figure S1

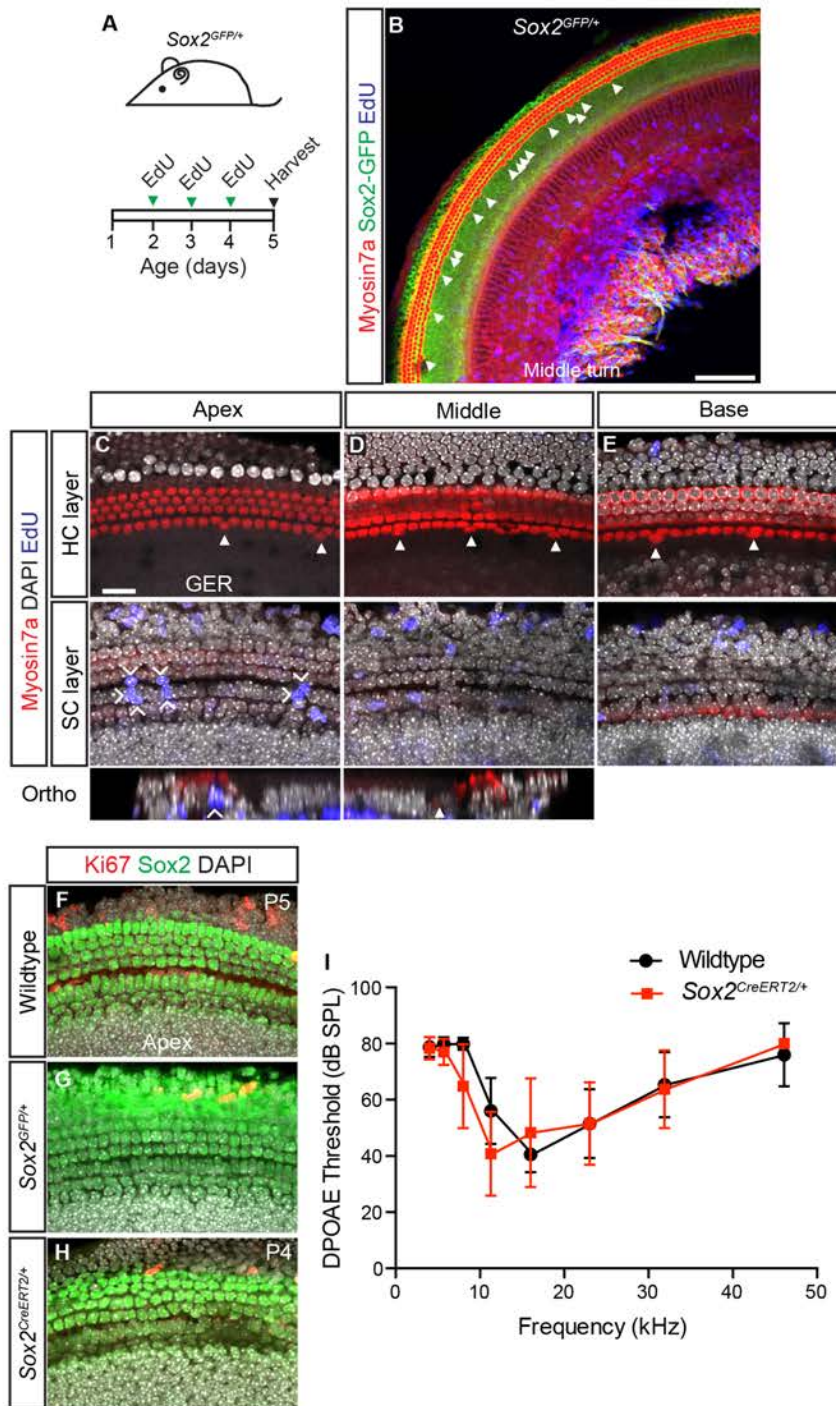

Supplementary Figure 1. Proliferation and ectopic hair cells in the postnatal *Sox2<sup>EGFP/+</sup>* cochlea. **(A)** Schematic of experimental paradigm. *Sox2<sup>EGFP/+</sup>* pups were injected EdU (P2-P4) and cochleae were examined at P5. **(B)** Low magnification image showing ectopic hair cells (arrowheads) adjacent to inner hair cells in the middle turn of the *Sox2<sup>EGFP/+</sup>* cochlea. **(C-E)** High magnification image of *Sox2<sup>EGFP/+</sup>* cochlea showing ectopic hair cells (arrowheads) in all three cochlear turns, and EdU-labeled supporting cells (chevron) in the pillar cell region in the apical turn. EdU-labeled cells in the middle and basal turns are outside the organ of Corti. **(F-H)** No Ki67-labeled hair cells or supporting cells were found in the wildtype, *Sox2<sup>EGFP/+</sup>* and *Sox2<sup>CreERT2/+</sup>* cochleae (P4-P5). **(I)** P30 *Sox2<sup>CreERT2/+</sup>* mice exhibit comparable DPOAE thresholds as wildtype littermates. GER=greater epithelial ridge. Data are shown as mean ± S.D. (two-tailed Student's t-test), n=3-8, scale bar in B= 100 μm, scale bar in C=20 μm.

Figure S2

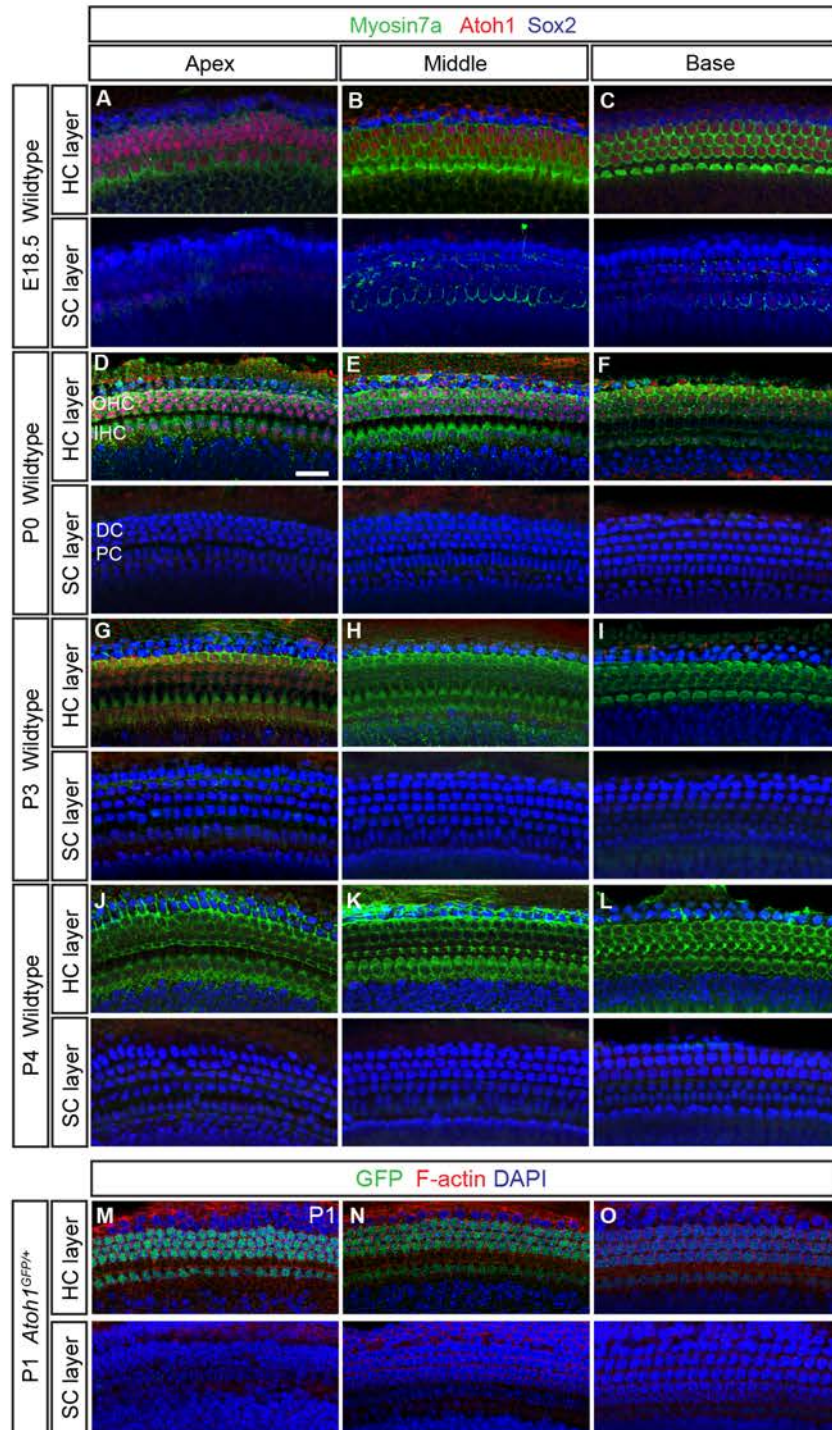

Supplementary Figure 2. *Atoh1* expression pattern in the embryonic and neonatal cochlea. **(A-C)** Immunostaining of E18.5 wildtype cochlea showed *Atoh1* expression in hair cells in an apex-to-base gradient, with weaker expression in basal hair cells. No *Atoh1*<sup>+</sup> supporting cells were found. **(D-F)** At P0 *Atoh1* remains expressed in hair cells in an apex-to-base gradient, with weaker expression in basal hair cells. No *Atoh1*<sup>+</sup> supporting cells were detected. **(G-I)** At P3, *Atoh1* expression was detected in the hair cells in the apical turn only. No *Atoh1*<sup>+</sup> supporting cells were found. **(J-L)** At P4, no *Atoh1* expression was detected in hair cells or supporting cells. **(M-O)** *Atoh1*-GFP expression in hair cells in an apex-to-base gradient in P1 *Atoh1*<sup>GFP/+</sup> mice. No *Atoh1*<sup>+</sup> supporting cells were found at this age. OHC=outer hair cells, IHC=inner hair cells, PC=pillar cells, DC=Deiters' cells, n=3, scale bar=20  $\mu$ m.

Figure S3

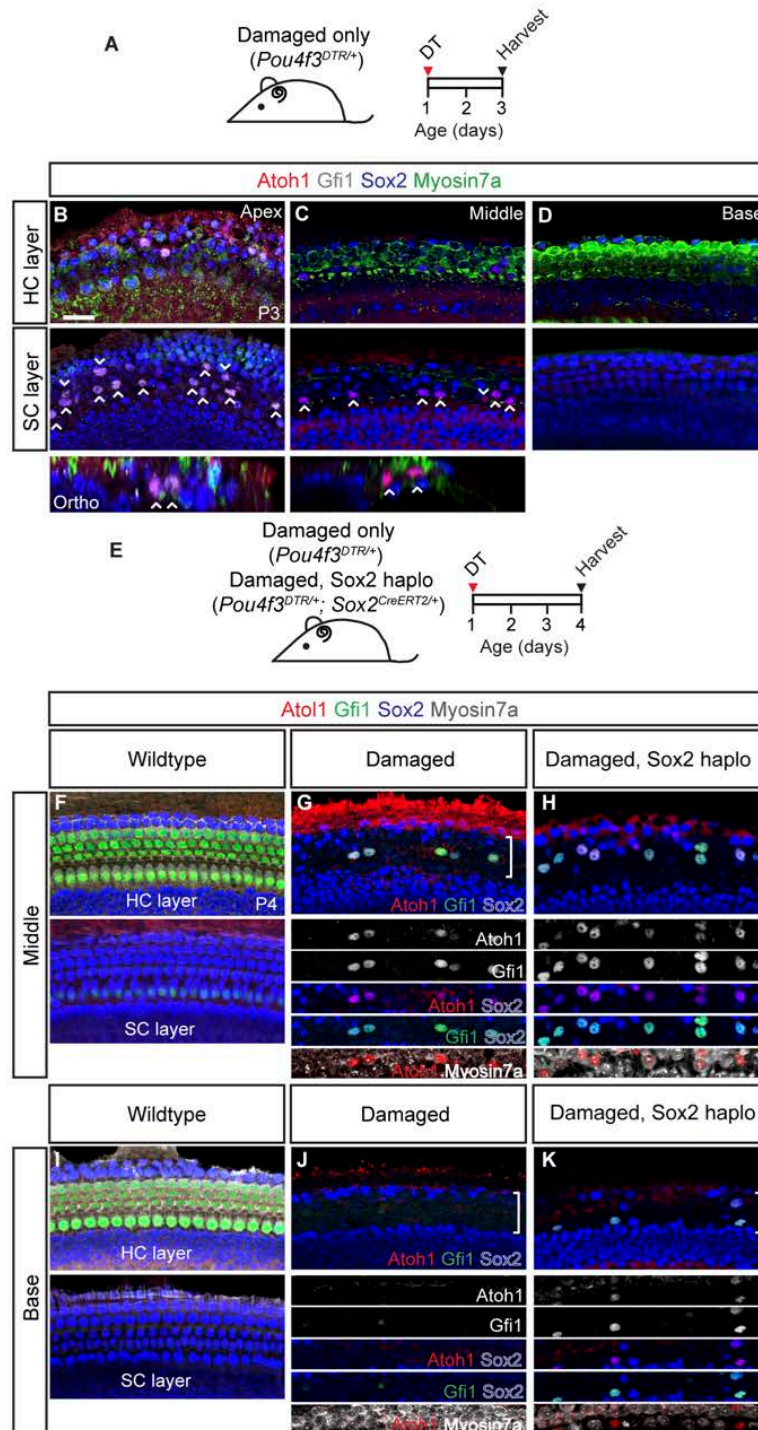

Supplementary Figure 3. Transitional cell formation after hair cell ablation. **(A)** Schematic of experimental paradigm. *Pou4f3<sup>DTR/+</sup>* mice were injected with diphtheria toxin (DT) at P1 and cochleae were harvested at P3. **(B-D)** After damage, Myosin7a<sup>+</sup> hair cells no longer express Gfi1. In the apical and middle turns, many Atoh1<sup>+</sup>, Gfi1<sup>+</sup>, Sox2<sup>+</sup> transitional cells (chevron) were detected. No Atoh1<sup>+</sup> or Gfi1<sup>+</sup> transitional cells were detected in the basal turn. **(E)** *Pou4f3<sup>DTR/+</sup>* or *Pou4f3<sup>DTR/+</sup>; Sox2<sup>CreERT2/+</sup>* mice were injected with DT at P1 and cochleae were examined at P4. **(F, I)** Hair cells (Myosin7a<sup>+</sup> and Sox2<sup>+</sup>) in middle and basal turns of wildtype cochlea expressed Gfi1 but not Atoh1. No Atoh1 or Gfi1 expression was detected in the supporting cells. **(G, J)** After damage, many Atoh1<sup>+</sup>, Gfi1<sup>+</sup>, Sox2<sup>+</sup>, Myosin7a<sup>+</sup> transitional cells were detected in the middle but not basal turn of the *Pou4f3<sup>DTR/+</sup>* cochlea. **(H, K)** In the *Pou4f3<sup>DTR/+</sup>; Sox2<sup>CreERT2/+</sup>* (damaged, Sox2 haplo) cochlea, there were noticeably more Atoh1<sup>+</sup>, Gfi1<sup>+</sup>, Sox2<sup>+</sup>, Myosin7a<sup>+</sup> transitional cells in the middle and basal turns. n=3, scale bar=20  $\mu$ m.

Figure S4

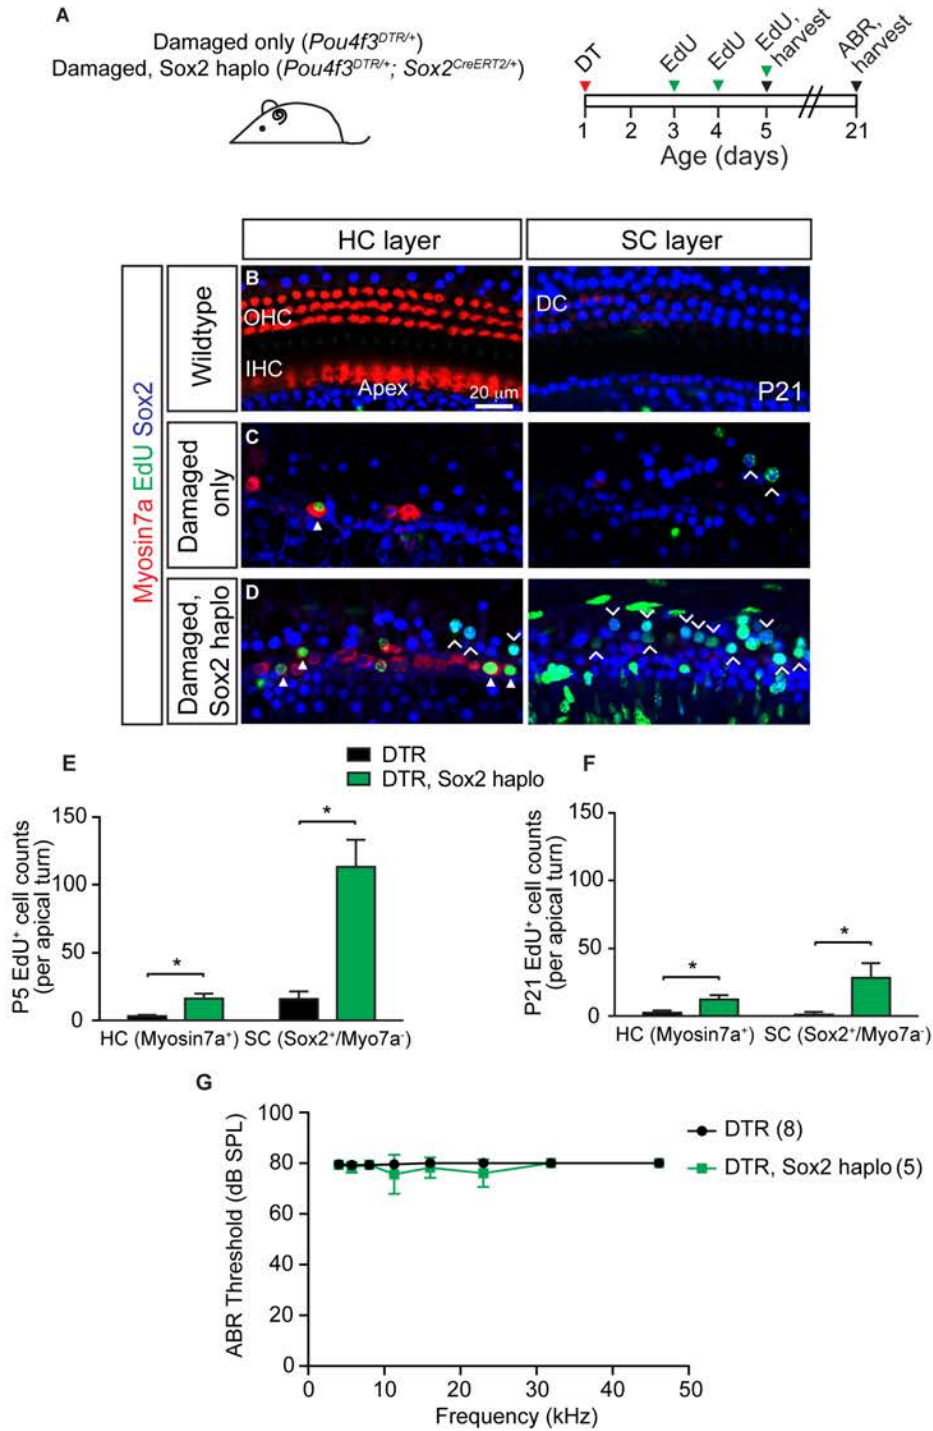

Supplementary Figure 4. Survival of regenerated hair cells and supporting cells. **(A)** Schematic of experimental timeline: hair cells were damaged at P1, EdU was injected at P3-P5 and cochleae were examined at P5 or P21. **(B)** In the wildtype P21 cochlea, there were no EdU-positive hair cells or supporting cells. **(C)** In the P21 damaged only cochlea, few hair cells remained alongside disorganized supporting cells. Few mitotically regenerated hair cells (arrowhead) and supporting cells (chevron) were observed in the apical turn. **(D)** In the apical turn of P21 damaged, Sox2 haplo cochlea, many mitotically regenerated hair cells and supporting cells were observed. **(E-F)** Quantification of EdU-positive hair cells and supporting cell in the apical turn of P5 and P21 cochleae. **(G)** Both P21 damaged only and damaged, Sox2 haplo animals displayed elevated ABR thresholds. OHC=outer hair cells, IHC=inner hair cells, DC=Deiters' cells, n=3-8, scale bar=20 μm. \*p<0.05, Student's t-test.

Figure S5

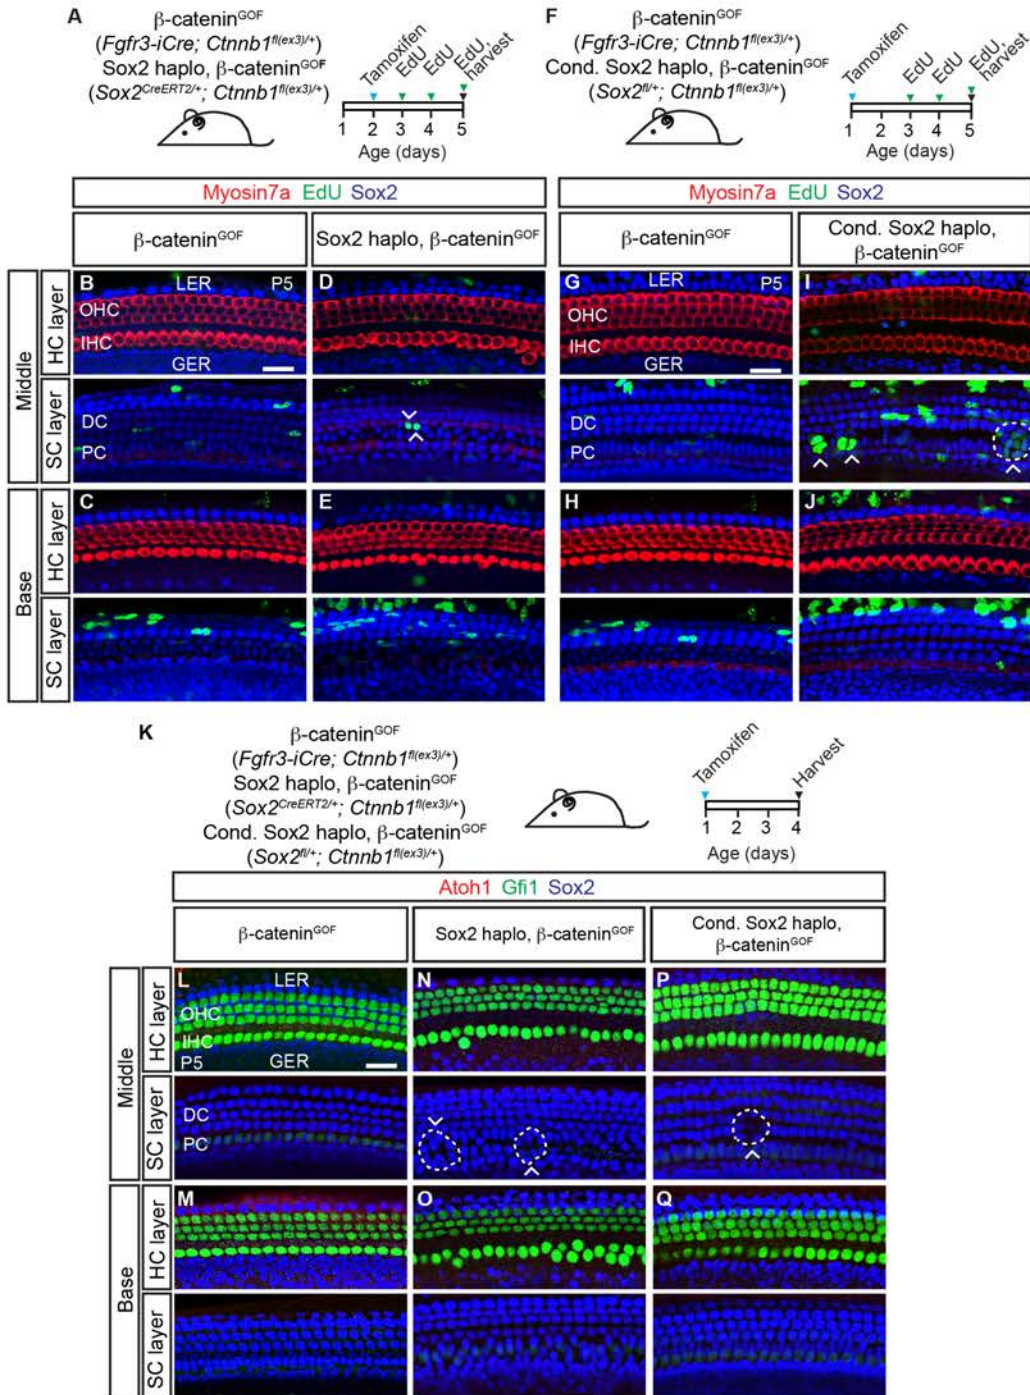

Supplementary Figure 5. Sox2 haploinsufficiency acts as a permissive signal for  $\beta$ -catenin-induced proliferation in the undamaged cochlea. (A) Schematic of experimental paradigm. *Fgfr3-iCre; Ctnnb1<sup>fl(ex3)/+</sup>* and *Sox2<sup>CreERT2/+</sup>; Ctnnb1<sup>fl(ex3)/+</sup>* pups were injected with tamoxifen at P2, followed by EdU injection daily P3-P5, cochleae were examined at P5. (B-C) Middle and basal turns of *Fgfr3-iCre; Ctnnb1<sup>fl(ex3)/+</sup>* cochleae revealed no EdU<sup>+</sup> hair cells or supporting cells. (D-E) A few EdU<sup>+</sup> supporting cells (chevron) were detected in the middle turn of the *Sox2<sup>CreERT2/+</sup>; Ctnnb1<sup>fl(ex3)/+</sup>* cochlea. No EdU<sup>+</sup> supporting cells were found in the base. (F) *Fgfr3-iCre; Ctnnb1<sup>fl(ex3)/+</sup>* and *Fgfr3-iCre; Sox2<sup>fl/+</sup>; Ctnnb1<sup>fl(ex3)/+</sup>* pups were injected with tamoxifen at P1, followed by EdU injection P3-P5, cochleae were examined at P5. (G-H) No EdU<sup>+</sup> hair cells or supporting cells were detected in the middle and basal turns of *Fgfr3-iCre; Ctnnb1<sup>fl(ex3)/+</sup>* cochleae. (I-J) EdU<sup>+</sup> supporting cells (chevron) were found in the middle turn of *Fgfr3-iCre; Ctnnb1<sup>fl(ex3)/+</sup>; Sox2<sup>fl/+</sup>* cochleae, some of which formed foci (dashed lines). No EdU<sup>+</sup> supporting cells were seen in the base. (K) *Fgfr3-iCre; Ctnnb1<sup>fl(ex3)/+</sup>; Sox2<sup>CreERT2/+</sup>; Ctnnb1<sup>fl(ex3)/+</sup>* and *Fgfr3-iCre; Sox2<sup>fl/+</sup>; Ctnnb1<sup>fl(ex3)/+</sup>* pups received tamoxifen at P1 and cochleae were harvested at P4. (L-Q') Myosin7a<sup>+</sup> hair cells expressed Gfi1, but no Atoh1 or Gfi1 was detected in supporting cells in the *Fgfr3-iCre; Ctnnb1<sup>fl(ex3)/+</sup>; Sox2<sup>CreERT2/+</sup>; Ctnnb1<sup>fl(ex3)/+</sup>* or *Fgfr3-iCre; Ctnnb1<sup>fl(ex3)/+</sup>; Sox2<sup>fl/+</sup>* cochleae. (N', P') Foci of cells (dashed lines and chevron) were observed in the middle turn of *Sox2<sup>CreERT2/+</sup>; Ctnnb1<sup>fl(ex3)/+</sup>* and *Fgfr3-iCre; Ctnnb1<sup>fl(ex3)/+</sup>; Sox2<sup>fl/+</sup>* cochleae, but not the basal turn. OHC=outer hair cells, IHC=inner hair cells, GER=greater epithelial ridge, LER=lesser epithelial ridge, PC=pillar cells, DC=Deiters' cells, n=3, scale bar=20  $\mu$ m.

Figure S6

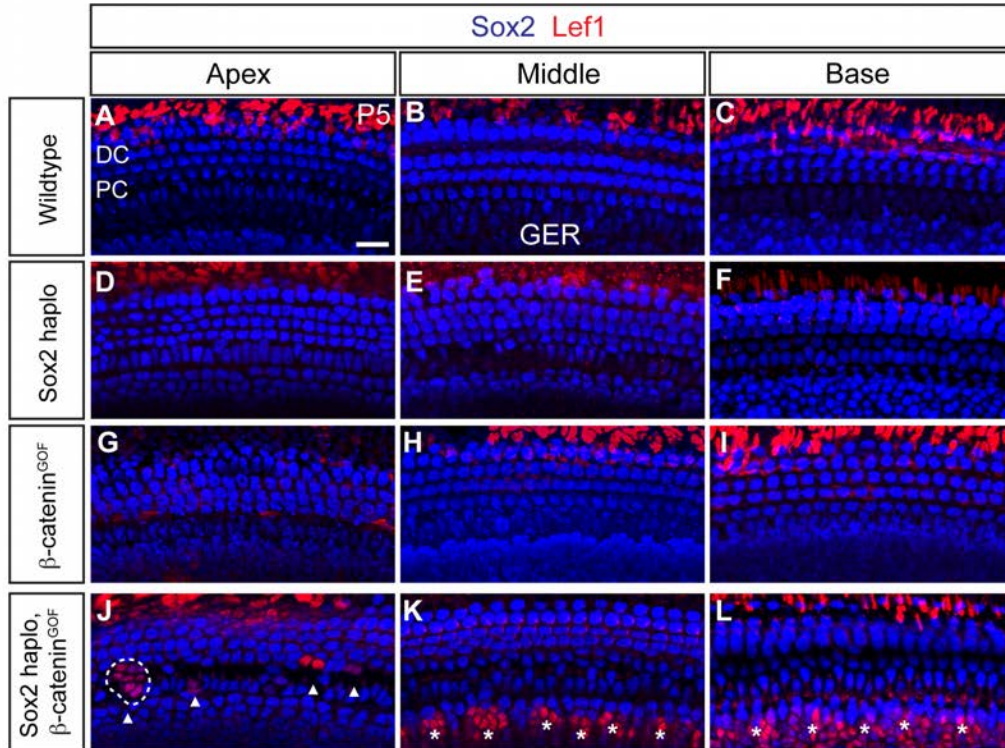

Supplementary Figure 6. Sox2 haploinsufficiency and  $\beta$ -catenin stabilization induce Lef1 expression in the neonatal cochlea. **(A-I)** No foci or Lef1 expression was observed in the P5 wildtype, *Sox2<sup>CreERT2/+</sup>*, or *Fgfr3-iCre; Ctnnb1<sup>fl(ex3)/+</sup>* cochleae. **(J-L)** Foci (dashed line) were observed in the pillar cell region in the apical turn of *Sox2<sup>CreERT2/+</sup>; Ctnnb1<sup>fl(ex3)/+</sup>* cochlea. These foci and supporting cells in the organ of Corti (arrowheads) and greater epithelial ridge (GER) (asterisks) also expressed the Wnt target Lef1. PC=pillar cells, DC=Deiters' cells, n=3-4, scale bar=20  $\mu$ m.

Figure S7

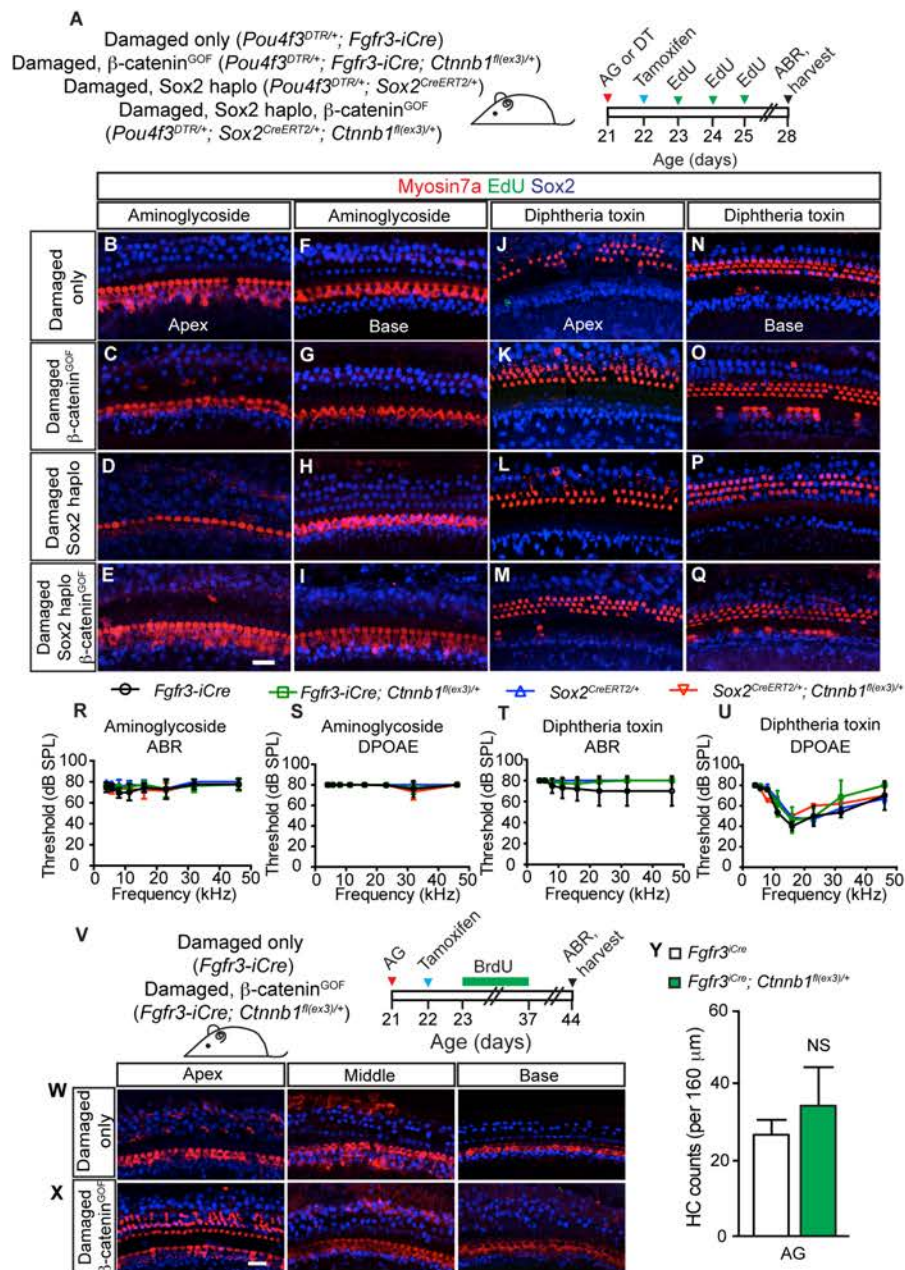

Supplementary Figure 7. Sox2 haploinsufficiency and  $\beta$ -catenin stabilization in the damaged adult cochlea. **(A)** Schematic of transgenic mouse models and experimental timeline. Animals were damaged at P21, Cre was activated by tamoxifen at P22, EdU from P23-P25, and sacrificed post ABR at P28. **(B-I)** Aminoglycoside treatment caused outer hair cell loss in the apical and basal turns in all cochleae. No Myosin7a<sup>+</sup>, Sox2<sup>+</sup> cells or EdU<sup>+</sup> hair cells or supporting cells were observed one week post treatment in all four groups. **(J-Q)** Severe inner hair cell loss and some outer hair cell loss was observed in the apex and base after diphtheria toxin treatment. No Myosin7a<sup>+</sup>, Sox2<sup>+</sup> cells or EdU<sup>+</sup> hair cells or supporting cells were detected. A rare EdU<sup>+</sup> cell in the inner sulcus region is shown in **(J)**. **(R-S)** Aminoglycoside treatment led to elevated thresholds in ABR and DPOAE without changes across genotypes one week post damage. **(T-U)** Diphtheria toxin treatment caused elevated ABR thresholds but not DPOAE thresholds. No changes in ABR or DPOAE thresholds were seen when measured one week after damage across genotypes tested. **(V)** Schematic of long term  $\beta$ -catenin stabilization in *Fgfr3-iCre* and *Fgfr3-iCre; Ctnnb1<sup>fl(ex3)/+</sup>* mice. Animals were damaged at P21, Cre was activated at P22 and BrdU was administered via drinking water from P23-P37, and sacrificed post ABR at P44. **(W-X)** No Myosin7a<sup>+</sup>, Sox2<sup>+</sup> cells or BrdU<sup>+</sup> cells were observed 3 weeks after  $\beta$ -catenin stabilization in the aminoglycoside-damaged cochlea. **(Y)** There was no significant difference in Myosin7a<sup>+</sup> hair cell counts along the length of the cochlea when comparing  $\beta$ -catenin stabilization to control cochleae (two-tailed Student's t-test), n=3-5, scale bar=20  $\mu$ m.

Figure S8

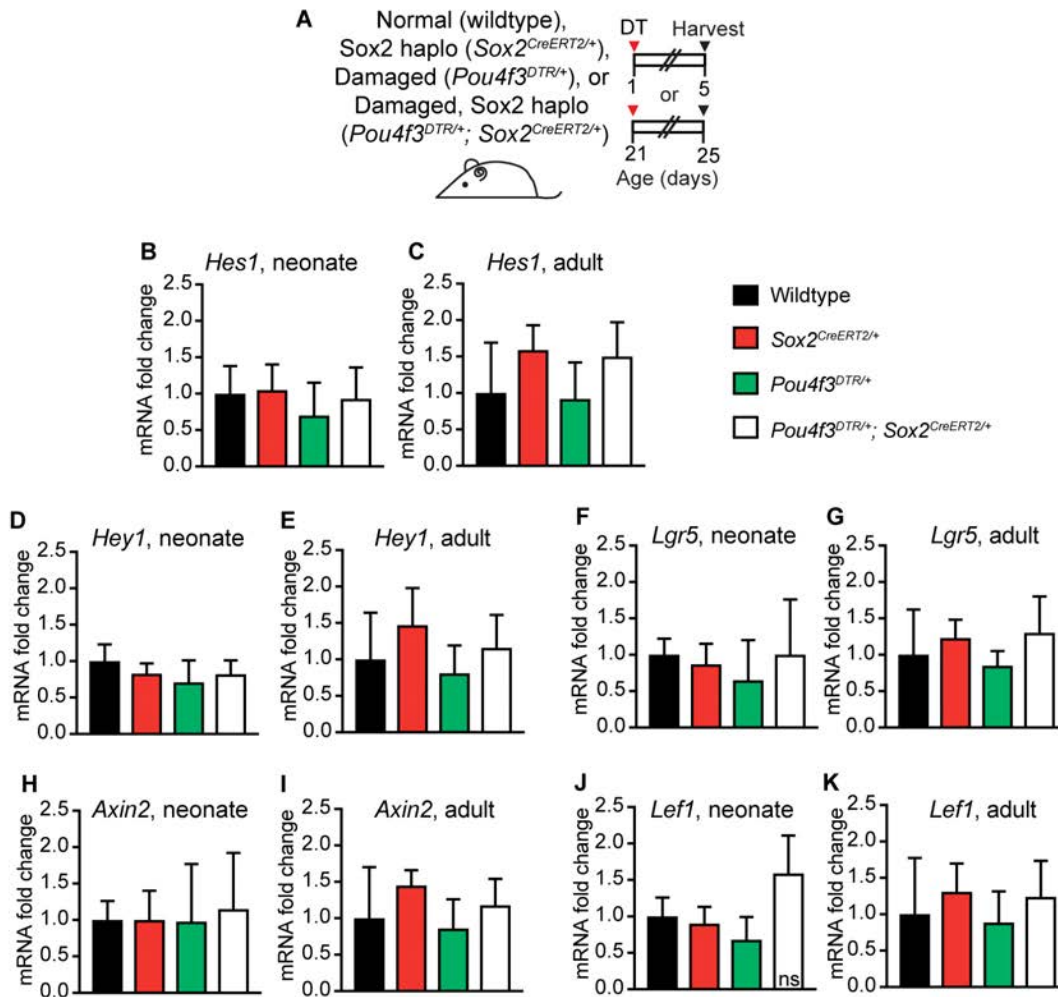

Supplementary Figure 8. Quantitative PCR of Notch and Wnt target genes in damaged and Sox2 haploinsufficient cochleae. (A) Neonatal (P1) and mature (P21) wildtype,  $Sox2^{CreERT2/+}$ ,  $Pou4f3^{DTR/+}$ , and  $Pou4f3^{DTR/+}; Sox2^{CreERT2/+}$  mice were treated with DT and cochleae were collected 4 days later. (B-E) There was no significant difference in the expression of the Notch target genes (*Hes1* and *Hey1*) in the neonate or adult cochleae. (F-K) Similarly, there was no significant difference in the expression of the Wnt target genes (*Lgr5*, *Axin2* or *Lef1*) in either the neonate or adult cochleae in all four genotypes examined. There was a downregulation of *Axin2*, *Hey1*, *Lef1* and *Lgr5* in the mature, wildtype cochlea relative to the neonate, wildtype cochlea. (one-way ANOVA, Holm-Sidak multiple comparisons, Student's t-test),  $n=4$ .



Figure S9

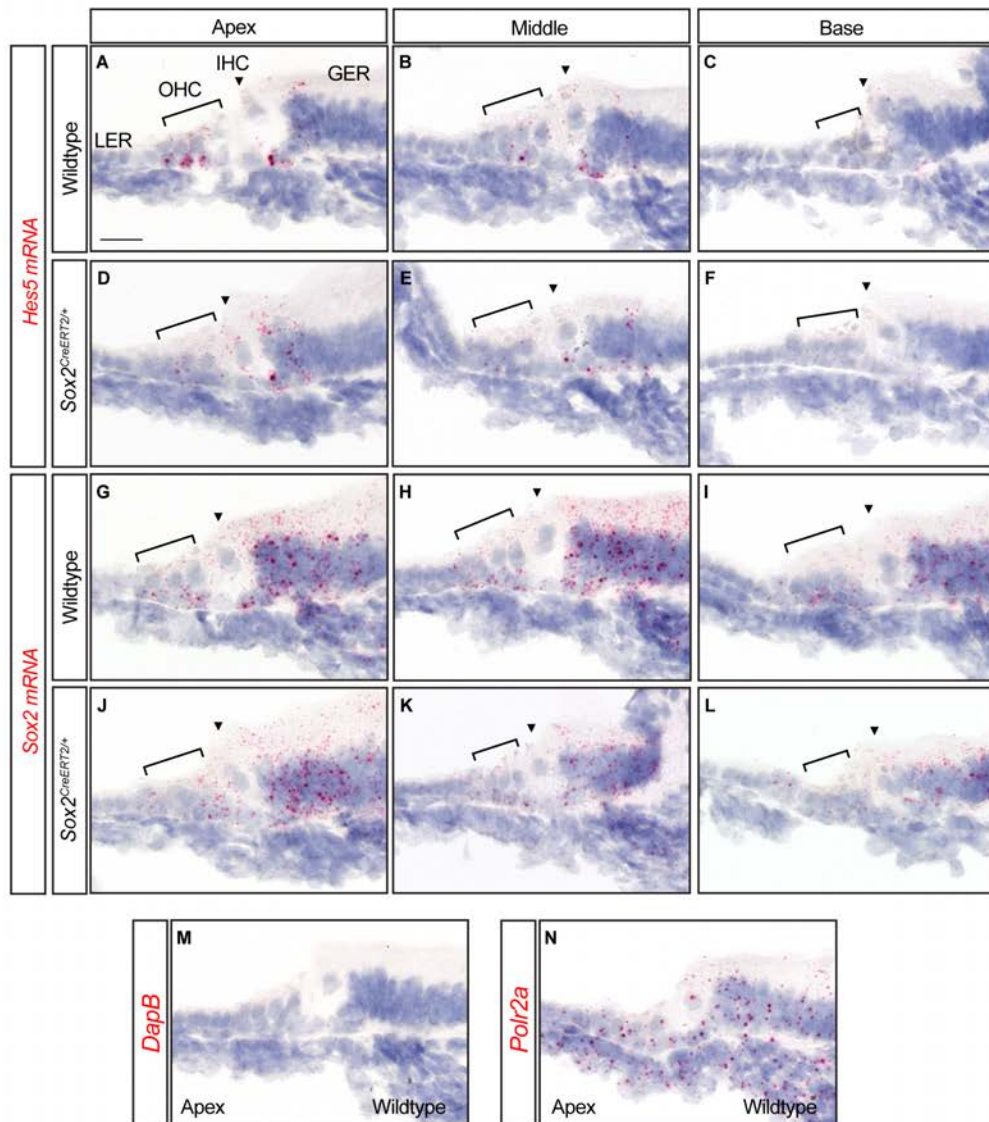

Supplementary Figure 9. *Hes5* and *Sox2* mRNA expression in P5 wildtype and *Sox2<sup>CreERT2/+</sup>* cochleae. **(A-C)** *In situ* hybridization using RNAscope shows *Hes5* expression in organ of Corti and greater epithelial ridge (GER) supporting cells in the wildtype cochlea. Expression was more robust in the apex and lower in the base. **(D-F)** *Hes5* expression also displayed an apical-basal gradient in supporting cells in the *Sox2<sup>CreERT2/+</sup>* cochlea, and is noticeably lower than wildtype cochlea. **(G-L)** *Sox2* expression was detected in organ of Corti and GER supporting cells in both wildtype and *Sox2<sup>CreERT2/+</sup>* cochleae, the latter of which appeared to display similar or slightly lower *Sox2* expression. **(M)** Negative control. **(N)** Positive control. Shown are representative images for 3 or more experiments. OHC=outer hair cells, IHC=inner hair cells, LER=lesser epithelial ridge. Scale bar=25  $\mu$ m.

Supplementary table 1. Quantification of proliferative cells

| P5<br>Genotypes                                                                              | Apex                                   |                                                          | Middle                                 |                                                             | Base                                   |                                                             |
|----------------------------------------------------------------------------------------------|----------------------------------------|----------------------------------------------------------|----------------------------------------|-------------------------------------------------------------|----------------------------------------|-------------------------------------------------------------|
|                                                                                              | EdU <sup>+</sup><br>Myo7a <sup>+</sup> | EdU <sup>+</sup> Sox2 <sup>+</sup><br>Myo7a <sup>-</sup> | EdU <sup>+</sup><br>Myo7a <sup>+</sup> | EdU <sup>+</sup><br>Sox2 <sup>+</sup><br>Myo7a <sup>-</sup> | EdU <sup>+</sup><br>Myo7a <sup>+</sup> | EdU <sup>+</sup><br>Sox2 <sup>+</sup><br>Myo7a <sup>-</sup> |
| Wildtype                                                                                     | 0                                      | 0                                                        | 0                                      | 0                                                           | 0                                      | 0                                                           |
| <i>Sox2-CreERT2</i>                                                                          | 0                                      | (10.2±4.8)                                               | 0                                      | 0                                                           | 0                                      | 0                                                           |
| <i>Sox2-EGFP</i>                                                                             | 0                                      | (22.8±13.8)                                              | 0                                      | 0                                                           | 0                                      | 0                                                           |
| <i>Fgfr3-iCreER;</i><br><i>Ctnnb1-fl(ex3)</i><br>(P2 tamox)                                  | 0                                      | 0                                                        | 0                                      | 0                                                           | 0                                      | 0                                                           |
| <i>Sox2-</i><br><i>CreERT2;</i><br><i>Ctnnb1-fl(ex3)</i><br>(P2 tamox)                       | 0                                      | 3.5±0.1<br>(39.3±1.5)                                    | 0                                      | 0.3±0.1<br>(3.3±1.5)                                        | 0                                      | 0                                                           |
| <i>Fgfr3-iCreER;</i><br><i>Ctnnb1-fl(ex3)</i><br>(P1 tamox)                                  | 0                                      | 0                                                        | 0                                      | 0                                                           | 0                                      | 0                                                           |
| <i>Fgfr3-iCreER;</i><br><i>Sox2-fl;</i><br><i>Ctnnb1-fl(ex3)</i><br>(P1 tamox)               | 0                                      | 2.5±0.7<br>(27.7±7.4)                                    | 0                                      | 4.0±1.2<br>(45.3±12.0)                                      | 0                                      | 0                                                           |
| <i>Pou4f3-DTR</i>                                                                            | 0.3±0.1<br>(3.2±0.8)                   | 1.4±0.5<br>(15.8±5.6)                                    | 0                                      | 0                                                           | 0                                      | 0                                                           |
| <i>Pou4f3-DTR;</i><br><i>Sox2-CreERT2</i>                                                    | 1.5±0.3<br>(16.2±3.6)                  | 10.3±1.9<br>(113.2±20.1)                                 | 0                                      | 3.9±0.6<br>(43.2±6.3)                                       | 0                                      | 0                                                           |
| <i>Pou4f3-DTR;</i><br><i>Fgfr3-iCreER;</i><br><i>Ctnnb1-fl(ex3)</i><br>(P2 tamox)            | 0.8±0.2<br>(8.3±2.1)                   | 5.2±1.4<br>(57.7±14.6)                                   | 0                                      | 0                                                           | 0                                      | 0                                                           |
| <i>Pou4f3-DTR;</i><br><i>Sox2-</i><br><i>CreERT2;</i><br><i>Ctnnb1-fl(ex3)</i><br>(P2 tamox) | 1.4±0.2<br>(16.0±2.0)                  | 16.0±2.8<br>(186.8±31.3)                                 | 0.2±0.1<br>(2.0±1.4)                   | 3.1±0.4<br>(36.8±5.0)                                       | 0                                      | 0.1±0.2<br>(1.5±1.9)                                        |

-Shown are EdU<sup>+</sup> cell counts per 160 μm cochlear length from P5 mice. Also shown in parenthesis are counts per cochlear turn. Mean±S.D. n=3-6.

Supplementary Table 2. Quantification of transitional cells.

| P4<br>Genotypes                                                                   | Apex                                                                               |                                                                                    | Middle                                                                             |                                                                                    | Base                                                                               |                                                                                    |
|-----------------------------------------------------------------------------------|------------------------------------------------------------------------------------|------------------------------------------------------------------------------------|------------------------------------------------------------------------------------|------------------------------------------------------------------------------------|------------------------------------------------------------------------------------|------------------------------------------------------------------------------------|
|                                                                                   | Atoh1 <sup>+</sup><br>Gfi1 <sup>+</sup><br>Sox2 <sup>+</sup><br>Myo7a <sup>+</sup> | Atoh1 <sup>+</sup><br>Gfi1 <sup>+</sup><br>Sox2 <sup>+</sup><br>Myo7a <sup>-</sup> | Atoh1 <sup>+</sup><br>Gfi1 <sup>+</sup><br>Sox2 <sup>+</sup><br>Myo7a <sup>+</sup> | Atoh1 <sup>+</sup><br>Gfi1 <sup>+</sup><br>Sox2 <sup>+</sup><br>Myo7a <sup>-</sup> | Atoh1 <sup>+</sup><br>Gfi1 <sup>+</sup><br>Sox2 <sup>+</sup><br>Myo7a <sup>+</sup> | Atoh1 <sup>+</sup><br>Gfi1 <sup>+</sup><br>Sox2 <sup>+</sup><br>Myo7a <sup>-</sup> |
| Wildtype                                                                          | 0                                                                                  | 0                                                                                  | 0                                                                                  | 0                                                                                  | 0                                                                                  | 0                                                                                  |
| <i>Sox2-CreERT2</i>                                                               | 0                                                                                  | 0                                                                                  | 0                                                                                  | 0                                                                                  | 0                                                                                  | 0                                                                                  |
| <i>Fgfr3-iCreER;</i><br><i>Ctnnb1-fl(ex3)</i><br>(P1 tamox)                       | 0                                                                                  | 0                                                                                  | 0                                                                                  | 0                                                                                  | 0                                                                                  | 0                                                                                  |
| <i>Sox2-CreERT2;</i><br><i>Ctnnb1-fl(ex3)</i><br>(P1 tamox)                       | 0                                                                                  | 0                                                                                  | 0                                                                                  | 0                                                                                  | 0                                                                                  | 0                                                                                  |
| <i>Fgfr3-iCreER;</i><br><i>Sox2-fl;</i><br><i>Ctnnb1-fl(ex3)</i><br>(P1 tamox)    | 0                                                                                  | 0                                                                                  | 0                                                                                  | 0                                                                                  | 0                                                                                  | 0                                                                                  |
| <i>Pou4f3-DTR</i>                                                                 | 9.7±0.6                                                                            | 0                                                                                  | 5.0±1.0                                                                            | 0                                                                                  | 0.3±0.6                                                                            | 0                                                                                  |
| <i>Pou4f3-DTR;</i><br><i>Sox2-CreERT2</i>                                         | 12.7±1.2                                                                           | 0                                                                                  | 8.3±1.5                                                                            | 1.3±0.6                                                                            | 3.7±0.6                                                                            | 0.3±0.6                                                                            |
| <i>Pou4f3-DTR;</i><br><i>Fgfr3-iCreER;</i><br><i>Ctnnb1-fl(ex3)</i><br>(P2 tamox) | 4.3±1.5                                                                            | 6.0±1.7                                                                            | 2.7±1.2                                                                            | 4.3±1.5                                                                            | 0                                                                                  | 0                                                                                  |
| <i>Pou4f3-DTR;</i><br><i>Sox2-CreERT2;</i><br><i>Ctnnb1-fl(ex3)</i><br>(P2 tamox) | 21.3±3.2                                                                           | 3.0±1.0                                                                            | 12.7±0.6                                                                           | 4.0±1.0                                                                            | 4.3±2.1                                                                            | 4.3±0.6                                                                            |

-Shown are Atoh1<sup>+</sup>, Sox2<sup>+</sup> transitional cell counts per 160 µm length from P4 cochleae. Mean±S.D. n=3-4.

Supplementary table 3. Quantification of Myosin7a<sup>+</sup> hair cells

|     | Genotypes                                  | Apex                   | Middle                 | Base                   |
|-----|--------------------------------------------|------------------------|------------------------|------------------------|
| P5  | Wildtype                                   | 84.8±4.4 <sup>#</sup>  | 87.0±3.7 <sup>#</sup>  | 76.8±3.4 <sup>#</sup>  |
|     | <i>Pou4f3-DTR</i>                          | 47.3±4.6               | 65.7±4.6               | 55.8±3.9               |
|     | <i>Pou4f3-DTR</i> ;<br><i>Sox2-CreERT2</i> | 57.8±5.3 <sup>**</sup> | 72.8±2.6 <sup>**</sup> | 58.2±3.4               |
| P7  | Wildtype                                   | 86.3±6.2 <sup>#</sup>  | 88.3±2.9 <sup>#</sup>  | 83.5±3.1 <sup>#</sup>  |
|     | <i>Pou4f3-DTR</i>                          | 47.0±4.6               | 57.3±2.5               | 36.0±6.6               |
|     | <i>Pou4f3-DTR</i> ;<br><i>Sox2-CreERT2</i> | 41.0±5.0               | 66.0±4.4 <sup>**</sup> | 47.0±3.6 <sup>**</sup> |
| P10 | Wildtype                                   | 87.7±2.3 <sup>#</sup>  | 84.3±1.2 <sup>#</sup>  | 79.0±6.1 <sup>#</sup>  |
|     | <i>Pou4f3-DTR</i>                          | 14.7±0.6               | 36.7±6.4               | 12.7±1.5               |
|     | <i>Pou4f3-DTR</i> ;<br><i>Sox2-CreERT2</i> | 41.0±4.0 <sup>**</sup> | 53.3±3.2 <sup>**</sup> | 26.3±2.5 <sup>**</sup> |
| P21 | Wildtype                                   | 79.3±4.2 <sup>#</sup>  | 85.3±3.8 <sup>#</sup>  | 77.3±3.2 <sup>#</sup>  |
|     | <i>Pou4f3-DTR</i>                          | 5.3±0.5                | 0                      | 0                      |
|     | <i>Pou4f3-DTR</i> ;<br><i>Sox2-CreERT2</i> | 17.5±3.9 <sup>**</sup> | 0                      | 0                      |

-Shown are Myosin7a<sup>+</sup> hair cell counts per 160 μm cochlear length from P5, P7, P10, P21 mice. Mean±S.D. n=3-6. \*\* denotes p<0.01 between *Pou4f3*<sup>DTR/+</sup> and *Pou4f3*<sup>DTR/+</sup>; *Sox2*<sup>CreERT2/+</sup> animals. # denotes p<0.001 between wildtype and the other two groups (two-way ANOVA and Tukey post hoc test).
